# Supplementary material for: Fecal Bacteria as Non-Invasive Biomarkers for Colorectal Adenocarcinoma
Source: Front Oncol. 2021 Aug 10;11:664321. doi: 10.3389/fonc.2021.664321 (PMC8383742; doi:10.3389/fonc.2021.664321)
Supplement: Supplementary file 6 [file Table_1.xlsx]

## Sheet: phylum level
Taxon	healthy	tumor
k__Bacteria;p__Firmicutes	0.651374	0.489344
k__Bacteria;p__Bacteroidetes	0.108274	0.346614
k__Bacteria;p__Proteobacteria	0.133241	0.100706
k__Bacteria;p__Actinobacteria	0.0973953	0.0391412
k__Bacteria;p__Fusobacteria	0.00231665	0.0129084
k__Bacteria;p__Verrucomicrobia	0.00521691	0.00563028
k__Bacteria;p__Tenericutes	0.000920631	0.00222771
k__Bacteria;p__TM7	0.000564086	0.000753028
k__Bacteria;p__Chlorobi	0	0.000823915
k__Bacteria;p__Cyanobacteria	0.000432821	0.00016734
k__Bacteria;p__Synergistetes	0.000111753	0.000464832
k__Bacteria;p__Gemmatimonadetes	0	0.000328869
k__Bacteria;p__Nitrospirae	0	0.000314924
k__Bacteria;p__Lentisphaerae	6.91803e-05	0.000149908
k__Bacteria;p__Acidobacteria	0	0.000174312
k__Bacteria;p__Elusimicrobia	0	9.64526e-05
k__Bacteria;p__Planctomycetes	3.54771e-05	6.04282e-05
k__Bacteria;p__[Thermi]	4.78941e-05	1.04587e-05
k__Bacteria;p__Chloroflexi	0	4.06728e-05
k__Bacteria;p__SR1	0	2.78899e-05
k__Bacteria;p__OD1	0	1.62691e-05

## Sheet: class level
Taxon	healthy	tumor
k__Bacteria;p__Firmicutes;c__Clostridia	0.606128	0.455037
k__Bacteria;p__Bacteroidetes;c__Bacteroidia	0.107971	0.344898
k__Bacteria;p__Proteobacteria;c__Gammaproteobacteria	0.102392	0.0787728
k__Bacteria;p__Actinobacteria;c__Actinobacteria	0.0806323	0.0286116
k__Bacteria;p__Firmicutes;c__Bacilli	0.0244579	0.0227221
k__Bacteria;p__Firmicutes;c__Erysipelotrichi	0.0207878	0.0115848
k__Bacteria;p__Actinobacteria;c__Coriobacteriia	0.0167629	0.0105296
k__Bacteria;p__Proteobacteria;c__Betaproteobacteria	0.0143895	0.0103797
k__Bacteria;p__Proteobacteria;c__Deltaproteobacteria	0.00985554	0.00591499
k__Bacteria;p__Fusobacteria;c__Fusobacteriia	0.00231665	0.0129084
k__Bacteria;p__Proteobacteria;c__Alphaproteobacteria	0.00660406	0.00539321
k__Bacteria;p__Verrucomicrobia;c__Verrucomicrobiae	0.00521691	0.00563028
k__Bacteria;p__Tenericutes;c__Mollicutes	0.000920631	0.00220679
k__Bacteria;p__Bacteroidetes;c__[Saprospirae]	0.000303329	0.00107957
k__Bacteria;p__TM7;c__TM7-3	0.000564086	0.000753028
k__Bacteria;p__Chlorobi;c__OPB56	0	0.000823915
k__Bacteria;p__Synergistetes;c__Synergistia	0.000111753	0.000464832
k__Bacteria;p__Cyanobacteria;c__4C0d-2	0.000262531	9.64526e-05
k__Bacteria;p__Gemmatimonadetes;c__Gemmatimonadetes	0	0.000328869
k__Bacteria;p__Bacteroidetes;c__Sphingobacteriia	0	0.00032422
k__Bacteria;p__Nitrospirae;c__Nitrospira	0	0.000314924
k__Bacteria;p__Bacteroidetes;c__Flavobacteriia	0	0.000311437
k__Bacteria;p__Proteobacteria;c__Epsilonproteobacteria	0	0.000245199
k__Bacteria;p__Cyanobacteria;c__Chloroplast	0.00017029	7.08869e-05
k__Bacteria;p__Lentisphaerae;c__[Lentisphaeria]	6.91803e-05	0.000149908
k__Bacteria;p__Acidobacteria;c__[Chloracidobacteria]	0	0.000140612
k__Bacteria;p__Elusimicrobia;c__Elusimicrobia	0	9.64526e-05
k__Bacteria;p__Planctomycetes;c__Phycisphaerae	3.54771e-05	6.04282e-05
k__Bacteria;p__[Thermi];c__Deinococci	4.78941e-05	1.04587e-05
k__Bacteria;p__Chloroflexi;c__TK17	0	4.06728e-05
k__Bacteria;p__Acidobacteria;c__Acidobacteria-6	0	3.37003e-05
k__Bacteria;p__SR1;c__Unclassified_SR1	0	2.78899e-05
k__Bacteria;p__Tenericutes;c__RF3	0	2.09174e-05
k__Bacteria;p__OD1;c__SM2F11	0	1.62691e-05

## Sheet: order level
Taxon	healthy	tumor
k__Bacteria;p__Firmicutes;c__Clostridia;o__Clostridiales	0.606128	0.455037
k__Bacteria;p__Bacteroidetes;c__Bacteroidia;o__Bacteroidales	0.107971	0.344898
k__Bacteria;p__Proteobacteria;c__Gammaproteobacteria;o__Enterobacteriales	0.10133	0.0763219
k__Bacteria;p__Actinobacteria;c__Actinobacteria;o__Bifidobacteriales	0.0780017	0.0236007
k__Bacteria;p__Firmicutes;c__Bacilli;o__Lactobacillales	0.0236277	0.0190209
k__Bacteria;p__Firmicutes;c__Erysipelotrichi;o__Erysipelotrichales	0.0207878	0.0115848
k__Bacteria;p__Actinobacteria;c__Coriobacteriia;o__Coriobacteriales	0.0167629	0.0105296
k__Bacteria;p__Proteobacteria;c__Betaproteobacteria;o__Burkholderiales	0.0142973	0.00809156
k__Bacteria;p__Proteobacteria;c__Deltaproteobacteria;o__Desulfovibrionales	0.00985022	0.00585107
k__Bacteria;p__Fusobacteria;c__Fusobacteriia;o__Fusobacteriales	0.00231665	0.0129084
k__Bacteria;p__Verrucomicrobia;c__Verrucomicrobiae;o__Verrucomicrobiales	0.00521691	0.00563028
k__Bacteria;p__Actinobacteria;c__Actinobacteria;o__Actinomycetales	0.00263063	0.00501089
k__Bacteria;p__Proteobacteria;c__Alphaproteobacteria;o__Rhizobiales	0.00338097	0.00208942
k__Bacteria;p__Proteobacteria;c__Alphaproteobacteria;o__Sphingomonadales	0.0014315	0.00239853
k__Bacteria;p__Firmicutes;c__Bacilli;o__Gemellales	0.000269626	0.00340606
k__Bacteria;p__Tenericutes;c__Mollicutes;o__RF39	0.000920631	0.00220679
k__Bacteria;p__Proteobacteria;c__Gammaproteobacteria;o__Pasteurellales	0.000585372	0.00125969
k__Bacteria;p__Proteobacteria;c__Betaproteobacteria;o__Neisseriales	5.14418e-05	0.00162924
k__Bacteria;p__Proteobacteria;c__Alphaproteobacteria;o__RF32	0.0010448	0.000363731
k__Bacteria;p__Bacteroidetes;c__[Saprospirae];o__[Saprospirales]	0.000303329	0.00107957
k__Bacteria;p__TM7;c__TM7-3;o__Unclassified_TM7-3	0.000489584	0.000596147
k__Bacteria;p__Proteobacteria;c__Alphaproteobacteria;o__Caulobacterales	0.000734376	0.000251009
k__Bacteria;p__Chlorobi;c__OPB56;o__Unclassified_OPB56	0	0.000823915
k__Bacteria;p__Proteobacteria;c__Gammaproteobacteria;o__Pseudomonadales	0.000182707	0.000588012
k__Bacteria;p__Proteobacteria;c__Gammaproteobacteria;o__Aeromonadales	0.000290912	0.000421835
k__Bacteria;p__Firmicutes;c__Bacilli;o__Turicibacterales	0.00037251	0.000291682
k__Bacteria;p__Proteobacteria;c__Betaproteobacteria;o__Rhodocyclales	2.30601e-05	0.000577554
k__Bacteria;p__Synergistetes;c__Synergistia;o__Synergistales	0.000111753	0.000464832
k__Bacteria;p__Bacteroidetes;c__Sphingobacteriia;o__Sphingobacteriales	0	0.00032422
k__Bacteria;p__Nitrospirae;c__Nitrospira;o__Nitrospirales	0	0.000314924
k__Bacteria;p__Bacteroidetes;c__Flavobacteriia;o__Flavobacteriales	0	0.000311437
k__Bacteria;p__Proteobacteria;c__Alphaproteobacteria;o__Rhodobacterales	0	0.000288196
k__Bacteria;p__Cyanobacteria;c__4C0d-2;o__YS2	0.000182707	7.2049e-05
k__Bacteria;p__Gemmatimonadetes;c__Gemmatimonadetes;o__Unclassified_Gemmatimonadetes	0	0.000245199
k__Bacteria;p__Proteobacteria;c__Epsilonproteobacteria;o__Campylobacterales	0	0.000245199
k__Bacteria;p__Cyanobacteria;c__Chloroplast;o__Streptophyta	0.00017029	7.08869e-05
k__Bacteria;p__Lentisphaerae;c__[Lentisphaeria];o__Victivallales	6.91803e-05	0.000149908
k__Bacteria;p__TM7;c__TM7-3;o__CW040	4.07987e-05	0.000154557
k__Bacteria;p__Firmicutes;c__Bacilli;o__Bacillales	0.000188029	3.48624e-06
k__Bacteria;p__Proteobacteria;c__Gammaproteobacteria;o__Xanthomonadales	3.54771e-06	0.000181284
k__Bacteria;p__Acidobacteria;c__[Chloracidobacteria];o__RB41	0	0.000140612
k__Bacteria;p__Cyanobacteria;c__4C0d-2;o__MLE1-12	7.98235e-05	2.44037e-05
k__Bacteria;p__Elusimicrobia;c__Elusimicrobia;o__Elusimicrobiales	0	9.64526e-05
k__Bacteria;p__Planctomycetes;c__Phycisphaerae;o__Phycisphaerales	3.54771e-05	6.04282e-05
k__Bacteria;p__Gemmatimonadetes;c__Gemmatimonadetes;o__Gemmatimonadales	0	8.36698e-05
k__Bacteria;p__Proteobacteria;c__Deltaproteobacteria;o__Myxococcales	5.32156e-06	6.39144e-05
k__Bacteria;p__[Thermi];c__Deinococci;o__Thermales	4.78941e-05	1.04587e-05
k__Bacteria;p__Proteobacteria;c__Betaproteobacteria;o__Unclassified_Betaproteobacteria	1.77385e-05	3.48624e-05
k__Bacteria;p__Proteobacteria;c__Betaproteobacteria;o__SC-I-84	0	4.64832e-05
k__Bacteria;p__Chloroflexi;c__TK17;o__mle1-48	0	4.06728e-05
k__Bacteria;p__TM7;c__TM7-3;o__I025	3.37032e-05	2.32416e-06
k__Bacteria;p__Acidobacteria;c__Acidobacteria-6;o__iii1-15	0	3.37003e-05
k__Bacteria;p__SR1;c__Unclassified_SR1;o__Unclassified_SR1	0	2.78899e-05
k__Bacteria;p__Tenericutes;c__RF3;o__ML615J-28	0	2.09174e-05
k__Bacteria;p__OD1;c__SM2F11;o__Unclassified_SM2F11	0	1.62691e-05
k__Bacteria;p__Proteobacteria;c__Alphaproteobacteria;o__Rickettsiales	1.2417e-05	2.32416e-06

## Sheet: family level
Taxon	healthy	tumor
k__Bacteria;p__Firmicutes;c__Clostridia;o__Clostridiales;f__Ruminococcaceae	0.234092	0.189362
k__Bacteria;p__Firmicutes;c__Clostridia;o__Clostridiales;f__Lachnospiraceae	0.264617	0.157698
k__Bacteria;p__Bacteroidetes;c__Bacteroidia;o__Bacteroidales;f__Bacteroidaceae	0.0733072	0.217852
k__Bacteria;p__Proteobacteria;c__Gammaproteobacteria;o__Enterobacteriales;f__Enterobacteriaceae	0.105822	0.0773029
k__Bacteria;p__Firmicutes;c__Clostridia;o__Clostridiales;f__Veillonellaceae	0.0480792	0.0565641
k__Bacteria;p__Actinobacteria;c__Actinobacteria;o__Bifidobacteriales;f__Bifidobacteriaceae	0.0765133	0.0271063
k__Bacteria;p__Bacteroidetes;c__Bacteroidia;o__Bacteroidales;f__Prevotellaceae	0.015987	0.0514429
k__Bacteria;p__Firmicutes;c__Clostridia;o__Clostridiales;f__Unclassified_Clostridiales	0.025221	0.0267173
k__Bacteria;p__Firmicutes;c__Bacilli;o__Lactobacillales;f__Streptococcaceae	0.023039	0.014008
k__Bacteria;p__Firmicutes;c__Erysipelotrichi;o__Erysipelotrichales;f__Erysipelotrichaceae	0.0204432	0.0114519
k__Bacteria;p__Bacteroidetes;c__Bacteroidia;o__Bacteroidales;f__Rikenellaceae	0.0108979	0.020997
k__Bacteria;p__Actinobacteria;c__Coriobacteriia;o__Coriobacteriales;f__Coriobacteriaceae	0.0165729	0.0109567
k__Bacteria;p__Bacteroidetes;c__Bacteroidia;o__Bacteroidales;f__Porphyromonadaceae	0.00163087	0.0237197
k__Bacteria;p__Firmicutes;c__Clostridia;o__Clostridiales;f__Clostridiaceae	0.0116525	0.0131586
k__Bacteria;p__Firmicutes;c__Clostridia;o__Clostridiales;f__Peptostreptococcaceae	0.0159209	0.00543869
k__Bacteria;p__Proteobacteria;c__Betaproteobacteria;o__Burkholderiales;f__Alcaligenaceae	0.0118542	0.00699899
k__Bacteria;p__Proteobacteria;c__Deltaproteobacteria;o__Desulfovibrionales;f__Desulfovibrionaceae	0.00968609	0.00570582
k__Bacteria;p__Fusobacteria;c__Fusobacteriia;o__Fusobacteriales;f__Fusobacteriaceae	0.00242891	0.0122723
k__Bacteria;p__Bacteroidetes;c__Bacteroidia;o__Bacteroidales;f__[Barnesiellaceae]	0.00333475	0.0097731
k__Bacteria;p__Verrucomicrobia;c__Verrucomicrobiae;o__Verrucomicrobiales;f__Verrucomicrobiaceae	0.00511862	0.00725605
k__Bacteria;p__Firmicutes;c__Bacilli;o__Lactobacillales;f__Lactobacillaceae	0.0014796	0.00686375
k__Bacteria;p__Firmicutes;c__Clostridia;o__Clostridiales;f__[Tissierellaceae]	0.000128661	0.00689281
k__Bacteria;p__Bacteroidetes;c__Bacteroidia;o__Bacteroidales;f__S24-7	0.0015335	0.00335308
k__Bacteria;p__Bacteroidetes;c__Bacteroidia;o__Bacteroidales;f__[Odoribacteraceae]	0.00077892	0.00371632
k__Bacteria;p__Proteobacteria;c__Alphaproteobacteria;o__Sphingomonadales;f__Sphingomonadaceae	0.00139614	0.00233374
k__Bacteria;p__Firmicutes;c__Bacilli;o__Gemellales;f__Gemellaceae	0.000266015	0.00330949
k__Bacteria;p__Bacteroidetes;c__Bacteroidia;o__Bacteroidales;f__[Paraprevotellaceae]	0.00123445	0.00209008
k__Bacteria;p__Actinobacteria;c__Actinobacteria;o__Actinomycetales;f__Micrococcaceae	0.000425972	0.00267911
k__Bacteria;p__Tenericutes;c__Mollicutes;o__RF39;f__Unclassified_RF39	0.000902365	0.0021605
k__Bacteria;p__Proteobacteria;c__Alphaproteobacteria;o__Rhizobiales;f__Brucellaceae	0.00156132	0.000990275
k__Bacteria;p__Proteobacteria;c__Betaproteobacteria;o__Burkholderiales;f__Comamonadaceae	0.00165868	0.00070191
k__Bacteria;p__Actinobacteria;c__Actinobacteria;o__Actinomycetales;f__Actinomycetaceae	0.00132486	0.000649379
k__Bacteria;p__Proteobacteria;c__Gammaproteobacteria;o__Pasteurellales;f__Pasteurellaceae	0.000763273	0.00119034
k__Bacteria;p__Firmicutes;c__Clostridia;o__Clostridiales;f__[Mogibacteriaceae]	0.000443359	0.00140829
k__Bacteria;p__Proteobacteria;c__Alphaproteobacteria;o__Rhizobiales;f__Methylobacteriaceae	0.00145352	0.000223538
k__Bacteria;p__Firmicutes;c__Bacilli;o__Lactobacillales;f__Carnobacteriaceae	0.000551156	0.00101933
k__Bacteria;p__Firmicutes;c__Clostridia;o__Clostridiales;f__Christensenellaceae	0.000413801	0.00115569
k__Bacteria;p__Firmicutes;c__Bacilli;o__Lactobacillales;f__Enterococcaceae	0.000323391	0.00113781
k__Bacteria;p__Proteobacteria;c__Betaproteobacteria;o__Neisseriales;f__Neisseriaceae	5.04e-05	0.00137588
k__Bacteria;p__Proteobacteria;c__Alphaproteobacteria;o__RF32;f__Unclassified_RF32	0.00102407	0.000349838
k__Bacteria;p__Bacteroidetes;c__[Saprospirae];o__[Saprospirales];f__Chitinophagaceae	0.000297311	0.000995863
k__Bacteria;p__Actinobacteria;c__Actinobacteria;o__Actinomycetales;f__Pseudonocardiaceae	0.000820648	0.000302894
k__Bacteria;p__TM7;c__TM7-3;o__Unclassified_TM7-3;f__Unclassified_TM7-3	0.000488564	0.000535374
k__Bacteria;p__Proteobacteria;c__Alphaproteobacteria;o__Caulobacterales;f__Caulobacteraceae	0.000719806	0.000241421
k__Bacteria;p__Actinobacteria;c__Actinobacteria;o__Actinomycetales;f__Microbacteriaceae	4.52e-05	0.00077009
k__Bacteria;p__Chlorobi;c__OPB56;o__Unclassified_OPB56;f__Unclassified_OPB56	0	0.000791326
k__Bacteria;p__Proteobacteria;c__Gammaproteobacteria;o__Aeromonadales;f__Aeromonadaceae	0.000339039	0.000414664
k__Bacteria;p__Proteobacteria;c__Betaproteobacteria;o__Burkholderiales;f__Unclassified_Burkholderiales	0.000479871	0.00017436
k__Bacteria;p__Firmicutes;c__Bacilli;o__Turicibacterales;f__Turicibacteraceae	0.000365119	0.000281658
k__Bacteria;p__Proteobacteria;c__Gammaproteobacteria;o__Pseudomonadales;f__Moraxellaceae	0.000173866	0.000459371
k__Bacteria;p__Proteobacteria;c__Betaproteobacteria;o__Rhodocyclales;f__Rhodocyclaceae	2.26e-05	0.00055214
k__Bacteria;p__Proteobacteria;c__Alphaproteobacteria;o__Rhizobiales;f__Unclassified_Rhizobiales	6.78e-05	0.000418017
k__Bacteria;p__Firmicutes;c__Bacilli;o__Lactobacillales;f__Leuconostocaceae	0.000252106	0.000153124
k__Bacteria;p__Proteobacteria;c__Betaproteobacteria;o__Burkholderiales;f__Oxalobacteraceae	0.000314698	8.05e-05
k__Bacteria;p__Synergistetes;c__Synergistia;o__Synergistales;f__Synergistaceae	7.82e-05	0.000242539
k__Bacteria;p__Proteobacteria;c__Gammaproteobacteria;o__Pseudomonadales;f__Pseudomonadaceae	0.000210378	0.000107298
k__Bacteria;p__Bacteroidetes;c__Sphingobacteriia;o__Sphingobacteriales;f__Unclassified_Sphingobacteriales	0	0.000310718
k__Bacteria;p__Nitrospirae;c__Nitrospira;o__Nitrospirales;f__Nitrospiraceae	0	0.000299541
k__Bacteria;p__Bacteroidetes;c__Flavobacteriia;o__Flavobacteriales;f__Flavobacteriaceae	0	0.000293953
k__Bacteria;p__Proteobacteria;c__Alphaproteobacteria;o__Rhizobiales;f__Rhizobiaceae	0.00014257	0.0001453
k__Bacteria;p__Proteobacteria;c__Alphaproteobacteria;o__Rhodobacterales;f__Rhodobacteraceae	0	0.00027607
k__Bacteria;p__Bacteroidetes;c__Bacteroidia;o__Bacteroidales;f__Unclassified_Bacteroidales	0	0.000272717
k__Bacteria;p__Cyanobacteria;c__4C0d-2;o__YS2;f__Unclassified_YS2	0.000179082	6.93e-05
k__Bacteria;p__Cyanobacteria;c__Chloroplast;o__Streptophyta;f__Unclassified_Streptophyta	0.000175605	6.82e-05
k__Bacteria;p__Synergistetes;c__Synergistia;o__Synergistales;f__Dethiosulfovibrionaceae	3.13e-05	0.000204538
k__Bacteria;p__Gemmatimonadetes;c__Gemmatimonadetes;o__Unclassified_Gemmatimonadetes;f__Unclassified_Gemmatimonadetes	0	0.000235833
k__Bacteria;p__Proteobacteria;c__Epsilonproteobacteria;o__Campylobacterales;f__Campylobacteraceae	0	0.000230245
k__Bacteria;p__Lentisphaerae;c__[Lentisphaeria];o__Victivallales;f__Victivallaceae	6.78e-05	0.0001453
k__Bacteria;p__Proteobacteria;c__Alphaproteobacteria;o__Rhizobiales;f__Phyllobacteriaceae	2.96e-05	0.000157595
k__Bacteria;p__Firmicutes;c__Bacilli;o__Bacillales;f__Bacillaceae	0.000180821	1.12e-06
k__Bacteria;p__Proteobacteria;c__Gammaproteobacteria;o__Xanthomonadales;f__Xanthomonadaceae	3.48e-06	0.00017436
k__Bacteria;p__Firmicutes;c__Clostridia;o__Clostridiales;f__Eubacteriaceae	0.000137354	4.02e-05
k__Bacteria;p__TM7;c__TM7-3;o__CW040;f__Unclassified_CW040	4.87e-05	9.05e-05
k__Bacteria;p__Acidobacteria;c__[Chloracidobacteria];o__RB41;f__Ellin6075	0	0.000134123
k__Bacteria;p__Proteobacteria;c__Alphaproteobacteria;o__Rhizobiales;f__Bradyrhizobiaceae	8.35e-05	4.92e-05
k__Bacteria;p__Cyanobacteria;c__4C0d-2;o__MLE1-12;f__Unclassified_MLE1-12	7.82e-05	2.35e-05
k__Bacteria;p__Fusobacteria;c__Fusobacteriia;o__Fusobacteriales;f__Leptotrichiaceae	0	9.72e-05
k__Bacteria;p__Planctomycetes;c__Phycisphaerae;o__Phycisphaerales;f__Unclassified_Phycisphaerales	3.48e-05	5.81e-05
k__Bacteria;p__Elusimicrobia;c__Elusimicrobia;o__Elusimicrobiales;f__Elusimicrobiaceae	0	9.28e-05
k__Bacteria;p__Gemmatimonadetes;c__Gemmatimonadetes;o__Gemmatimonadales;f__Gemmatimonadaceae	0	8.05e-05
k__Bacteria;p__[Thermi];c__Deinococci;o__Thermales;f__Thermaceae	4.69e-05	1.01e-05
k__Bacteria;p__Proteobacteria;c__Deltaproteobacteria;o__Myxococcales;f__Unclassified_Myxococcales	0	5.7e-05
k__Bacteria;p__Proteobacteria;c__Betaproteobacteria;o__Unclassified_Betaproteobacteria;f__Unclassified_Betaproteobacteria	1.74e-05	3.35e-05
k__Bacteria;p__Proteobacteria;c__Betaproteobacteria;o__SC-I-84;f__Unclassified_SC-I-84	0	4.47e-05
k__Bacteria;p__Bacteroidetes;c__[Saprospirae];o__[Saprospirales];f__Saprospiraceae	0	4.14e-05
k__Bacteria;p__Chloroflexi;c__TK17;o__mle1-48;f__Unclassified_mle1-48	0	3.91e-05
k__Bacteria;p__TM7;c__TM7-3;o__CW040;f__F16	0	3.8e-05
k__Bacteria;p__TM7;c__TM7-3;o__I025;f__Rs-045	3.3e-05	2.24e-06
k__Bacteria;p__Proteobacteria;c__Alphaproteobacteria;o__Rhizobiales;f__Hyphomicrobiaceae	0	3.13e-05
k__Bacteria;p__Firmicutes;c__Bacilli;o__Lactobacillales;f__Aerococcaceae	1.74e-05	1.34e-05
k__Bacteria;p__Acidobacteria;c__Acidobacteria-6;o__iii1-15;f__mb2424	0	3.02e-05
k__Bacteria;p__Actinobacteria;c__Actinobacteria;o__Actinomycetales;f__Propionibacteriaceae	6.95e-06	2.12e-05
k__Bacteria;p__Proteobacteria;c__Betaproteobacteria;o__Burkholderiales;f__Burkholderiaceae	0	2.79e-05
k__Bacteria;p__Actinobacteria;c__Actinobacteria;o__Actinomycetales;f__Brevibacteriaceae	1.74e-05	7.82e-06
k__Bacteria;p__Firmicutes;c__Bacilli;o__Lactobacillales;f__Unclassified_Lactobacillales	1.91e-05	4.47e-06
k__Bacteria;p__Actinobacteria;c__Actinobacteria;o__Actinomycetales;f__Corynebacteriaceae	3.48e-06	2.01e-05
k__Bacteria;p__SR1;c__Unclassified_SR1;o__Unclassified_SR1;f__Unclassified_SR1	0	2.35e-05
k__Bacteria;p__Tenericutes;c__RF3;o__ML615J-28;f__Unclassified_ML615J-28	0	2.01e-05
k__Bacteria;p__Firmicutes;c__Clostridia;o__Clostridiales;f__Peptococcaceae	1.04e-05	8.94e-06
k__Bacteria;p__Proteobacteria;c__Alphaproteobacteria;o__Sphingomonadales;f__Unclassified_Sphingomonadales	6.95e-06	1.12e-05
k__Bacteria;p__Actinobacteria;c__Actinobacteria;o__Actinomycetales;f__Nocardiaceae	0	1.68e-05
k__Bacteria;p__Firmicutes;c__Bacilli;o__Gemellales;f__Unclassified_Gemellales	0	1.56e-05
k__Bacteria;p__OD1;c__SM2F11;o__Unclassified_SM2F11;f__Unclassified_SM2F11	0	1.56e-05
k__Bacteria;p__Proteobacteria;c__Alphaproteobacteria;o__Rickettsiales;f__mitochondria	1.22e-05	2.24e-06
k__Bacteria;p__Proteobacteria;c__Deltaproteobacteria;o__Myxococcales;f__Myxococcaceae	5.22e-06	4.47e-06
k__Bacteria;p__Firmicutes;c__Bacilli;o__Bacillales;f__Staphylococcaceae	3.48e-06	2.24e-06
k__Bacteria;p__Proteobacteria;c__Gammaproteobacteria;o__Aeromonadales;f__Succinivibrionaceae	0	2.24e-06

## Sheet: genus level
Taxon	healthy	tumor
k__Bacteria;p__Acidobacteria;c__Acidobacteria-6;o__iii1-15;f__mb2424;g__Unclassified_mb2424	0	0.112971
k__Bacteria;p__Acidobacteria;c__[Chloracidobacteria];o__RB41;f__Ellin6075;g__Unclassified_Ellin6075	0	0.502092
k__Bacteria;p__Actinobacteria;c__Actinobacteria;o__Actinomycetales;f__Actinomycetaceae;g__Actinomyces	4.91613	2.43096
k__Bacteria;p__Actinobacteria;c__Actinobacteria;o__Actinomycetales;f__Brevibacteriaceae;g__Brevibacterium	0.0645161	0.0292887
k__Bacteria;p__Actinobacteria;c__Actinobacteria;o__Actinomycetales;f__Corynebacteriaceae;g__Corynebacterium	0.0129032	0.0753138
k__Bacteria;p__Actinobacteria;c__Actinobacteria;o__Actinomycetales;f__Microbacteriaceae;g__Cryocola	0.083871	0
k__Bacteria;p__Actinobacteria;c__Actinobacteria;o__Actinomycetales;f__Microbacteriaceae;g__Microbacterium	0.083871	2.88285
k__Bacteria;p__Actinobacteria;c__Actinobacteria;o__Actinomycetales;f__Micrococcaceae;g__Rothia	1.58065	10.0293
k__Bacteria;p__Actinobacteria;c__Actinobacteria;o__Actinomycetales;f__Nocardiaceae;g__Rhodococcus	0	0.0627615
k__Bacteria;p__Actinobacteria;c__Actinobacteria;o__Actinomycetales;f__Propionibacteriaceae;g__Propionibacterium	0.0258065	0.0794979
k__Bacteria;p__Actinobacteria;c__Actinobacteria;o__Actinomycetales;f__Pseudonocardiaceae;g__Amycolatopsis	3.04516	1.13389
k__Bacteria;p__Actinobacteria;c__Actinobacteria;o__Bifidobacteriales;f__Bifidobacteriaceae;g__Bifidobacterium	283.903	101.427
k__Bacteria;p__Actinobacteria;c__Actinobacteria;o__Bifidobacteriales;f__Bifidobacteriaceae;g__Scardovia	0.0129032	0.0460251
k__Bacteria;p__Actinobacteria;c__Coriobacteriia;o__Coriobacteriales;f__Coriobacteriaceae;g__Adlercreutzia	0.845161	1.48117
k__Bacteria;p__Actinobacteria;c__Coriobacteriia;o__Coriobacteriales;f__Coriobacteriaceae;g__Atopobium	0.380645	0.389121
k__Bacteria;p__Actinobacteria;c__Coriobacteriia;o__Coriobacteriales;f__Coriobacteriaceae;g__Collinsella	45.0839	33.4268
k__Bacteria;p__Actinobacteria;c__Coriobacteriia;o__Coriobacteriales;f__Coriobacteriaceae;g__Eggerthella	3.81935	1.82008
k__Bacteria;p__Actinobacteria;c__Coriobacteriia;o__Coriobacteriales;f__Coriobacteriaceae;g__Slackia	0.548387	0.531381
k__Bacteria;p__Actinobacteria;c__Coriobacteriia;o__Coriobacteriales;f__Coriobacteriaceae;g__Unclassified_Coriobacteriaceae	10.8194	3.3682
k__Bacteria;p__Bacteroidetes;c__Bacteroidia;o__Bacteroidales;f__Bacteroidaceae;g__Bacteroides	272.019	815.531
k__Bacteria;p__Bacteroidetes;c__Bacteroidia;o__Bacteroidales;f__Porphyromonadaceae;g__Parabacteroides	5.65806	44.0837
k__Bacteria;p__Bacteroidetes;c__Bacteroidia;o__Bacteroidales;f__Porphyromonadaceae;g__Porphyromonas	0.393548	44.7113
k__Bacteria;p__Bacteroidetes;c__Bacteroidia;o__Bacteroidales;f__Prevotellaceae;g__Prevotella	59.3226	192.577
k__Bacteria;p__Bacteroidetes;c__Bacteroidia;o__Bacteroidales;f__Rikenellaceae;g__Alistipes	0.974194	1.23013
k__Bacteria;p__Bacteroidetes;c__Bacteroidia;o__Bacteroidales;f__Rikenellaceae;g__Unclassified_Rikenellaceae	39.4645	77.3724
k__Bacteria;p__Bacteroidetes;c__Bacteroidia;o__Bacteroidales;f__S24-7;g__Unclassified_S24-7	5.69032	12.5523
k__Bacteria;p__Bacteroidetes;c__Bacteroidia;o__Bacteroidales;f__Unclassified_Bacteroidales;g__Unclassified_Bacteroidales	0	1.02092
k__Bacteria;p__Bacteroidetes;c__Bacteroidia;o__Bacteroidales;f__[Barnesiellaceae];g__Unclassified_[Barnesiellaceae]	12.3742	36.5858
k__Bacteria;p__Bacteroidetes;c__Bacteroidia;o__Bacteroidales;f__[Odoribacteraceae];g__Butyricimonas	2.29032	7.02929
k__Bacteria;p__Bacteroidetes;c__Bacteroidia;o__Bacteroidales;f__[Odoribacteraceae];g__Odoribacter	0.6	6.88285
k__Bacteria;p__Bacteroidetes;c__Bacteroidia;o__Bacteroidales;f__[Paraprevotellaceae];g__Paraprevotella	1.34839	2.58159
k__Bacteria;p__Bacteroidetes;c__Bacteroidia;o__Bacteroidales;f__[Paraprevotellaceae];g__Unclassified_[Paraprevotellaceae]	0.0774194	0.129707
k__Bacteria;p__Bacteroidetes;c__Bacteroidia;o__Bacteroidales;f__[Paraprevotellaceae];g__[Prevotella]	3.15484	5.11297
k__Bacteria;p__Bacteroidetes;c__Flavobacteriia;o__Flavobacteriales;f__Flavobacteriaceae;g__Capnocytophaga	0	0.0794979
k__Bacteria;p__Bacteroidetes;c__Flavobacteriia;o__Flavobacteriales;f__Flavobacteriaceae;g__Flavobacterium	0	0.753138
k__Bacteria;p__Bacteroidetes;c__Flavobacteriia;o__Flavobacteriales;f__Flavobacteriaceae;g__Unclassified_Flavobacteriaceae	0	0.267782
k__Bacteria;p__Bacteroidetes;c__Sphingobacteriia;o__Sphingobacteriales;f__Unclassified_Sphingobacteriales;g__Unclassified_Sphingobacteriales	0	1.16318
k__Bacteria;p__Bacteroidetes;c__[Saprospirae];o__[Saprospirales];f__Chitinophagaceae;g__Niabella	0	1.22594
k__Bacteria;p__Bacteroidetes;c__[Saprospirae];o__[Saprospirales];f__Chitinophagaceae;g__Sediminibacterium	1.10323	2.50209
k__Bacteria;p__Bacteroidetes;c__[Saprospirae];o__[Saprospirales];f__Saprospiraceae;g__Unclassified_Saprospiraceae	0	0.154812
k__Bacteria;p__Chlorobi;c__OPB56;o__Unclassified_OPB56;f__Unclassified_OPB56;g__Unclassified_OPB56	0	2.96234
k__Bacteria;p__Chloroflexi;c__TK17;o__mle1-48;f__Unclassified_mle1-48;g__Unclassified_mle1-48	0	0.146444
k__Bacteria;p__Cyanobacteria;c__4C0d-2;o__MLE1-12;f__Unclassified_MLE1-12;g__Unclassified_MLE1-12	0.290323	0.0878661
k__Bacteria;p__Cyanobacteria;c__4C0d-2;o__YS2;f__Unclassified_YS2;g__Unclassified_YS2	0.664516	0.259414
k__Bacteria;p__Cyanobacteria;c__Chloroplast;o__Streptophyta;f__Unclassified_Streptophyta;g__Unclassified_Streptophyta	0.651613	0.25523
k__Bacteria;p__Elusimicrobia;c__Elusimicrobia;o__Elusimicrobiales;f__Elusimicrobiaceae;g__Unclassified_Elusimicrobiaceae	0	0.34728
k__Bacteria;p__Firmicutes;c__Bacilli;o__Bacillales;f__Bacillaceae;g__Anoxybacillus	0.43871	0
k__Bacteria;p__Firmicutes;c__Bacilli;o__Bacillales;f__Bacillaceae;g__Geobacillus	0.232258	0.0041841
k__Bacteria;p__Firmicutes;c__Bacilli;o__Bacillales;f__Staphylococcaceae;g__Staphylococcus	0.0129032	0.0083682
k__Bacteria;p__Firmicutes;c__Bacilli;o__Gemellales;f__Gemellaceae;g__Unclassified_Gemellaceae	0.987097	12.3891
k__Bacteria;p__Firmicutes;c__Bacilli;o__Gemellales;f__Unclassified_Gemellales;g__Unclassified_Gemellales	0	0.0585774
k__Bacteria;p__Firmicutes;c__Bacilli;o__Lactobacillales;f__Aerococcaceae;g__Unclassified_Aerococcaceae	0.0645161	0.0502092
k__Bacteria;p__Firmicutes;c__Bacilli;o__Lactobacillales;f__Carnobacteriaceae;g__Granulicatella	2.04516	3.8159
k__Bacteria;p__Firmicutes;c__Bacilli;o__Lactobacillales;f__Enterococcaceae;g__Enterococcus	1.2	4.25941
k__Bacteria;p__Firmicutes;c__Bacilli;o__Lactobacillales;f__Lactobacillaceae;g__Lactobacillus	2.50323	25.0795
k__Bacteria;p__Firmicutes;c__Bacilli;o__Lactobacillales;f__Lactobacillaceae;g__Pediococcus	0.0903226	0.209205
k__Bacteria;p__Firmicutes;c__Bacilli;o__Lactobacillales;f__Lactobacillaceae;g__Unclassified_Lactobacillaceae	2.89677	0.405858
k__Bacteria;p__Firmicutes;c__Bacilli;o__Lactobacillales;f__Leuconostocaceae;g__Leuconostoc	0.0258065	0.0376569
k__Bacteria;p__Firmicutes;c__Bacilli;o__Lactobacillales;f__Leuconostocaceae;g__Unclassified_Leuconostocaceae	0.909677	0.535565
k__Bacteria;p__Firmicutes;c__Bacilli;o__Lactobacillales;f__Streptococcaceae;g__Lactococcus	0.354839	0.707113
k__Bacteria;p__Firmicutes;c__Bacilli;o__Lactobacillales;f__Streptococcaceae;g__Streptococcus	85.1226	51.4895
k__Bacteria;p__Firmicutes;c__Bacilli;o__Lactobacillales;f__Streptococcaceae;g__Unclassified_Streptococcaceae	0.0129032	0.242678
k__Bacteria;p__Firmicutes;c__Bacilli;o__Lactobacillales;f__Unclassified_Lactobacillales;g__Unclassified_Lactobacillales	0.0709677	0.0167364
k__Bacteria;p__Firmicutes;c__Bacilli;o__Turicibacterales;f__Turicibacteraceae;g__Turicibacter	1.35484	1.05439
k__Bacteria;p__Firmicutes;c__Clostridia;o__Clostridiales;f__Christensenellaceae;g__Christensenella	0.154839	0.0753138
k__Bacteria;p__Firmicutes;c__Clostridia;o__Clostridiales;f__Christensenellaceae;g__Unclassified_Christensenellaceae	1.38065	4.25105
k__Bacteria;p__Firmicutes;c__Clostridia;o__Clostridiales;f__Clostridiaceae;g__02d06	0.16129	0.23431
k__Bacteria;p__Firmicutes;c__Clostridia;o__Clostridiales;f__Clostridiaceae;g__Clostridium	20.8774	13.1213
k__Bacteria;p__Firmicutes;c__Clostridia;o__Clostridiales;f__Clostridiaceae;g__SMB53	1.14839	0.200837
k__Bacteria;p__Firmicutes;c__Clostridia;o__Clostridiales;f__Clostridiaceae;g__Unclassified_Clostridiaceae	21.0516	35.7029
k__Bacteria;p__Firmicutes;c__Clostridia;o__Clostridiales;f__Eubacteriaceae;g__Pseudoramibacter_Eubacterium	0.509677	0.150628
k__Bacteria;p__Firmicutes;c__Clostridia;o__Clostridiales;f__Lachnospiraceae;g__Anaerostipes	3.52903	4.01674
k__Bacteria;p__Firmicutes;c__Clostridia;o__Clostridiales;f__Lachnospiraceae;g__Blautia	149.335	90.5105
k__Bacteria;p__Firmicutes;c__Clostridia;o__Clostridiales;f__Lachnospiraceae;g__Clostridium	0	0.242678
k__Bacteria;p__Firmicutes;c__Clostridia;o__Clostridiales;f__Lachnospiraceae;g__Coprococcus	31.9032	29.4854
k__Bacteria;p__Firmicutes;c__Clostridia;o__Clostridiales;f__Lachnospiraceae;g__Dorea	35.6387	18.6402
k__Bacteria;p__Firmicutes;c__Clostridia;o__Clostridiales;f__Lachnospiraceae;g__Epulopiscium	0	0.690377
k__Bacteria;p__Firmicutes;c__Clostridia;o__Clostridiales;f__Lachnospiraceae;g__Lachnobacterium	0.0516129	0.112971
k__Bacteria;p__Firmicutes;c__Clostridia;o__Clostridiales;f__Lachnospiraceae;g__Lachnospira	69.3226	25.9665
k__Bacteria;p__Firmicutes;c__Clostridia;o__Clostridiales;f__Lachnospiraceae;g__Moryella	0.0193548	0.410042
k__Bacteria;p__Firmicutes;c__Clostridia;o__Clostridiales;f__Lachnospiraceae;g__Oribacterium	0.0387097	0.154812
k__Bacteria;p__Firmicutes;c__Clostridia;o__Clostridiales;f__Lachnospiraceae;g__Roseburia	138.974	56.4435
k__Bacteria;p__Firmicutes;c__Clostridia;o__Clostridiales;f__Lachnospiraceae;g__Unclassified_Lachnospiraceae	458.381	237.854
k__Bacteria;p__Firmicutes;c__Clostridia;o__Clostridiales;f__Lachnospiraceae;g__[Ruminococcus]	94.7161	125.82
k__Bacteria;p__Firmicutes;c__Clostridia;o__Clostridiales;f__Peptococcaceae;g__Unclassified_Peptococcaceae	0.0387097	0.0334728
k__Bacteria;p__Firmicutes;c__Clostridia;o__Clostridiales;f__Peptostreptococcaceae;g__Filifactor	0	0.966527
k__Bacteria;p__Firmicutes;c__Clostridia;o__Clostridiales;f__Peptostreptococcaceae;g__Peptostreptococcus	0.148387	8.29707
k__Bacteria;p__Firmicutes;c__Clostridia;o__Clostridiales;f__Peptostreptococcaceae;g__Unclassified_Peptostreptococcaceae	58.8387	11.0335
k__Bacteria;p__Firmicutes;c__Clostridia;o__Clostridiales;f__Peptostreptococcaceae;g__[Clostridium]	0.0903226	0.0627615
k__Bacteria;p__Firmicutes;c__Clostridia;o__Clostridiales;f__Ruminococcaceae;g__Anaerotruncus	0.283871	0.502092
k__Bacteria;p__Firmicutes;c__Clostridia;o__Clostridiales;f__Ruminococcaceae;g__Faecalibacterium	389.194	238.598
k__Bacteria;p__Firmicutes;c__Clostridia;o__Clostridiales;f__Ruminococcaceae;g__Oscillospira	11.8065	38.2636
k__Bacteria;p__Firmicutes;c__Clostridia;o__Clostridiales;f__Ruminococcaceae;g__Ruminococcus	50.0129	78.8954
k__Bacteria;p__Firmicutes;c__Clostridia;o__Clostridiales;f__Ruminococcaceae;g__Unclassified_Ruminococcaceae	417.342	352.619
k__Bacteria;p__Firmicutes;c__Clostridia;o__Clostridiales;f__Unclassified_Clostridiales;g__Unclassified_Clostridiales	93.5871	100.017
k__Bacteria;p__Firmicutes;c__Clostridia;o__Clostridiales;f__Veillonellaceae;g__Acidaminococcus	0.941935	1.89958
k__Bacteria;p__Firmicutes;c__Clostridia;o__Clostridiales;f__Veillonellaceae;g__Dialister	64.3484	25.0084
k__Bacteria;p__Firmicutes;c__Clostridia;o__Clostridiales;f__Veillonellaceae;g__Megamonas	43.4	81
k__Bacteria;p__Firmicutes;c__Clostridia;o__Clostridiales;f__Veillonellaceae;g__Megasphaera	10.8452	11.477
k__Bacteria;p__Firmicutes;c__Clostridia;o__Clostridiales;f__Veillonellaceae;g__Mitsuokella	0.754839	1.51464
k__Bacteria;p__Firmicutes;c__Clostridia;o__Clostridiales;f__Veillonellaceae;g__Phascolarctobacterium	52.0065	73.0251
k__Bacteria;p__Firmicutes;c__Clostridia;o__Clostridiales;f__Veillonellaceae;g__Selenomonas	0	0.171548
k__Bacteria;p__Firmicutes;c__Clostridia;o__Clostridiales;f__Veillonellaceae;g__Succiniclasticum	0	0.23431
k__Bacteria;p__Firmicutes;c__Clostridia;o__Clostridiales;f__Veillonellaceae;g__Unclassified_Veillonellaceae	0.774194	0.74477
k__Bacteria;p__Firmicutes;c__Clostridia;o__Clostridiales;f__Veillonellaceae;g__Veillonella	5.33548	16.6736
k__Bacteria;p__Firmicutes;c__Clostridia;o__Clostridiales;f__[Mogibacteriaceae];g__Mogibacterium	0.0129032	0.205021
k__Bacteria;p__Firmicutes;c__Clostridia;o__Clostridiales;f__[Mogibacteriaceae];g__Unclassified_[Mogibacteriaceae]	1.63226	5.06695
k__Bacteria;p__Firmicutes;c__Clostridia;o__Clostridiales;f__[Tissierellaceae];g__1-68	0	0.732218
k__Bacteria;p__Firmicutes;c__Clostridia;o__Clostridiales;f__[Tissierellaceae];g__Anaerococcus	0.0387097	0.179916
k__Bacteria;p__Firmicutes;c__Clostridia;o__Clostridiales;f__[Tissierellaceae];g__Finegoldia	0.0258065	0.16318
k__Bacteria;p__Firmicutes;c__Clostridia;o__Clostridiales;f__[Tissierellaceae];g__Parvimonas	0.206452	23.1841
k__Bacteria;p__Firmicutes;c__Clostridia;o__Clostridiales;f__[Tissierellaceae];g__Peptoniphilus	0.129032	1.0251
k__Bacteria;p__Firmicutes;c__Clostridia;o__Clostridiales;f__[Tissierellaceae];g__WAL_1855D	0.0774194	0.0711297
k__Bacteria;p__Firmicutes;c__Clostridia;o__Clostridiales;f__[Tissierellaceae];g__ph2	0	0.447699
k__Bacteria;p__Firmicutes;c__Erysipelotrichi;o__Erysipelotrichales;f__Erysipelotrichaceae;g__Bulleidia	0.716129	4.82427
k__Bacteria;p__Firmicutes;c__Erysipelotrichi;o__Erysipelotrichales;f__Erysipelotrichaceae;g__Catenibacterium	7.2	1.3682
k__Bacteria;p__Firmicutes;c__Erysipelotrichi;o__Erysipelotrichales;f__Erysipelotrichaceae;g__Coprobacillus	0.109677	0.23431
k__Bacteria;p__Firmicutes;c__Erysipelotrichi;o__Erysipelotrichales;f__Erysipelotrichaceae;g__Holdemania	0.290323	0.284519
k__Bacteria;p__Firmicutes;c__Erysipelotrichi;o__Erysipelotrichales;f__Erysipelotrichaceae;g__Unclassified_Erysipelotrichaceae	51.0516	19.5356
k__Bacteria;p__Firmicutes;c__Erysipelotrichi;o__Erysipelotrichales;f__Erysipelotrichaceae;g__[Eubacterium]	16.4903	16.6234
k__Bacteria;p__Fusobacteria;c__Fusobacteriia;o__Fusobacteriales;f__Fusobacteriaceae;g__Cetobacterium	0.00645161	0.259414
k__Bacteria;p__Fusobacteria;c__Fusobacteriia;o__Fusobacteriales;f__Fusobacteriaceae;g__Fusobacterium	9.00645	45.682
k__Bacteria;p__Fusobacteria;c__Fusobacteriia;o__Fusobacteriales;f__Leptotrichiaceae;g__Leptotrichia	0	0.364017
k__Bacteria;p__Gemmatimonadetes;c__Gemmatimonadetes;o__Gemmatimonadales;f__Gemmatimonadaceae;g__Gemmatimonas	0	0.301255
k__Bacteria;p__Gemmatimonadetes;c__Gemmatimonadetes;o__Unclassified_Gemmatimonadetes;f__Unclassified_Gemmatimonadetes;g__Unclassified_Gemmatimonadetes	0	0.882845
k__Bacteria;p__Lentisphaerae;c__[Lentisphaeria];o__Victivallales;f__Victivallaceae;g__Unclassified_Victivallaceae	0.206452	0.405858
k__Bacteria;p__Lentisphaerae;c__[Lentisphaeria];o__Victivallales;f__Victivallaceae;g__Victivallis	0.0451613	0.138075
k__Bacteria;p__Nitrospirae;c__Nitrospira;o__Nitrospirales;f__Nitrospiraceae;g__Nitrospira	0	1.12134
k__Bacteria;p__OD1;c__SM2F11;o__Unclassified_SM2F11;f__Unclassified_SM2F11;g__Unclassified_SM2F11	0	0.0585774
k__Bacteria;p__Planctomycetes;c__Phycisphaerae;o__Phycisphaerales;f__Unclassified_Phycisphaerales;g__Unclassified_Phycisphaerales	0.129032	0.217573
k__Bacteria;p__Proteobacteria;c__Alphaproteobacteria;o__Caulobacterales;f__Caulobacteraceae;g__Brevundimonas	0	0.0753138
k__Bacteria;p__Proteobacteria;c__Alphaproteobacteria;o__Caulobacterales;f__Caulobacteraceae;g__Unclassified_Caulobacteraceae	2.67097	0.828452
k__Bacteria;p__Proteobacteria;c__Alphaproteobacteria;o__RF32;f__Unclassified_RF32;g__Unclassified_RF32	3.8	1.30962
k__Bacteria;p__Proteobacteria;c__Alphaproteobacteria;o__Rhizobiales;f__Bradyrhizobiaceae;g__Bradyrhizobium	0.0387097	0.0083682
k__Bacteria;p__Proteobacteria;c__Alphaproteobacteria;o__Rhizobiales;f__Bradyrhizobiaceae;g__Unclassified_Bradyrhizobiaceae	0.270968	0.175732
k__Bacteria;p__Proteobacteria;c__Alphaproteobacteria;o__Rhizobiales;f__Brucellaceae;g__Ochrobactrum	5.79355	3.70711
k__Bacteria;p__Proteobacteria;c__Alphaproteobacteria;o__Rhizobiales;f__Hyphomicrobiaceae;g__Devosia	0	0.117155
k__Bacteria;p__Proteobacteria;c__Alphaproteobacteria;o__Rhizobiales;f__Methylobacteriaceae;g__Methylobacterium	0.174194	0.0794979
k__Bacteria;p__Proteobacteria;c__Alphaproteobacteria;o__Rhizobiales;f__Methylobacteriaceae;g__Unclassified_Methylobacteriaceae	5.21935	0.757322
k__Bacteria;p__Proteobacteria;c__Alphaproteobacteria;o__Rhizobiales;f__Phyllobacteriaceae;g__Mesorhizobium	0.0516129	0.560669
k__Bacteria;p__Proteobacteria;c__Alphaproteobacteria;o__Rhizobiales;f__Phyllobacteriaceae;g__Phyllobacterium	0.0580645	0.0125523
k__Bacteria;p__Proteobacteria;c__Alphaproteobacteria;o__Rhizobiales;f__Phyllobacteriaceae;g__Unclassified_Phyllobacteriaceae	0	0.0167364
k__Bacteria;p__Proteobacteria;c__Alphaproteobacteria;o__Rhizobiales;f__Rhizobiaceae;g__Agrobacterium	0.529032	0.543933
k__Bacteria;p__Proteobacteria;c__Alphaproteobacteria;o__Rhizobiales;f__Unclassified_Rhizobiales;g__Unclassified_Rhizobiales	0.251613	1.56485
k__Bacteria;p__Proteobacteria;c__Alphaproteobacteria;o__Rhodobacterales;f__Rhodobacteraceae;g__Rhodobacter	0	0.707113
k__Bacteria;p__Proteobacteria;c__Alphaproteobacteria;o__Rhodobacterales;f__Rhodobacteraceae;g__Unclassified_Rhodobacteraceae	0	0.32636
k__Bacteria;p__Proteobacteria;c__Alphaproteobacteria;o__Rickettsiales;f__mitochondria;g__Nelumbo	0.0451613	0.0083682
k__Bacteria;p__Proteobacteria;c__Alphaproteobacteria;o__Sphingomonadales;f__Sphingomonadaceae;g__Novosphingobium	0.148387	0.0167364
k__Bacteria;p__Proteobacteria;c__Alphaproteobacteria;o__Sphingomonadales;f__Sphingomonadaceae;g__Sphingobium	1.12903	0.142259
k__Bacteria;p__Proteobacteria;c__Alphaproteobacteria;o__Sphingomonadales;f__Sphingomonadaceae;g__Sphingomonas	3.85806	8.57322
k__Bacteria;p__Proteobacteria;c__Alphaproteobacteria;o__Sphingomonadales;f__Sphingomonadaceae;g__Unclassified_Sphingomonadaceae	0.0451613	0.0041841
k__Bacteria;p__Proteobacteria;c__Alphaproteobacteria;o__Sphingomonadales;f__Unclassified_Sphingomonadales;g__Unclassified_Sphingomonadales	0.0258065	0.041841
k__Bacteria;p__Proteobacteria;c__Betaproteobacteria;o__Burkholderiales;f__Alcaligenaceae;g__Sutterella	43.9871	26.2008
k__Bacteria;p__Proteobacteria;c__Betaproteobacteria;o__Burkholderiales;f__Burkholderiaceae;g__Lautropia	0	0.104603
k__Bacteria;p__Proteobacteria;c__Betaproteobacteria;o__Burkholderiales;f__Comamonadaceae;g__Comamonas	0	0.23431
k__Bacteria;p__Proteobacteria;c__Betaproteobacteria;o__Burkholderiales;f__Comamonadaceae;g__Delftia	0.851613	0.0460251
k__Bacteria;p__Proteobacteria;c__Betaproteobacteria;o__Burkholderiales;f__Comamonadaceae;g__Lampropedia	0	0.0585774
k__Bacteria;p__Proteobacteria;c__Betaproteobacteria;o__Burkholderiales;f__Comamonadaceae;g__Unclassified_Comamonadaceae	5.30323	2.2887
k__Bacteria;p__Proteobacteria;c__Betaproteobacteria;o__Burkholderiales;f__Oxalobacteraceae;g__Cupriavidus	1.00645	0.1841
k__Bacteria;p__Proteobacteria;c__Betaproteobacteria;o__Burkholderiales;f__Oxalobacteraceae;g__Herbaspirillum	0.0451613	0.0083682
k__Bacteria;p__Proteobacteria;c__Betaproteobacteria;o__Burkholderiales;f__Oxalobacteraceae;g__Oxalobacter	0.083871	0.108787
k__Bacteria;p__Proteobacteria;c__Betaproteobacteria;o__Burkholderiales;f__Oxalobacteraceae;g__Unclassified_Oxalobacteraceae	0.0322581	0
k__Bacteria;p__Proteobacteria;c__Betaproteobacteria;o__Burkholderiales;f__Unclassified_Burkholderiales;g__Unclassified_Burkholderiales	1.78065	0.65272
k__Bacteria;p__Proteobacteria;c__Betaproteobacteria;o__Neisseriales;f__Neisseriaceae;g__Eikenella	0	0.150628
k__Bacteria;p__Proteobacteria;c__Betaproteobacteria;o__Neisseriales;f__Neisseriaceae;g__Neisseria	0	4.91632
k__Bacteria;p__Proteobacteria;c__Betaproteobacteria;o__Neisseriales;f__Neisseriaceae;g__Unclassified_Neisseriaceae	0.187097	0.083682
k__Bacteria;p__Proteobacteria;c__Betaproteobacteria;o__Rhodocyclales;f__Rhodocyclaceae;g__Dok59	0	1.72385
k__Bacteria;p__Proteobacteria;c__Betaproteobacteria;o__Rhodocyclales;f__Rhodocyclaceae;g__Methyloversatilis	0.0129032	0.338912
k__Bacteria;p__Proteobacteria;c__Betaproteobacteria;o__Rhodocyclales;f__Rhodocyclaceae;g__Unclassified_Rhodocyclaceae	0.0709677	0.0041841
k__Bacteria;p__Proteobacteria;c__Betaproteobacteria;o__SC-I-84;f__Unclassified_SC-I-84;g__Unclassified_SC-I-84	0	0.167364
k__Bacteria;p__Proteobacteria;c__Betaproteobacteria;o__Unclassified_Betaproteobacteria;f__Unclassified_Betaproteobacteria;g__Unclassified_Betaproteobacteria	0.0645161	0.125523
k__Bacteria;p__Proteobacteria;c__Deltaproteobacteria;o__Desulfovibrionales;f__Desulfovibrionaceae;g__Bilophila	25.4774	15.2259
k__Bacteria;p__Proteobacteria;c__Deltaproteobacteria;o__Desulfovibrionales;f__Desulfovibrionaceae;g__Desulfovibrio	10.3419	6.07113
k__Bacteria;p__Proteobacteria;c__Deltaproteobacteria;o__Desulfovibrionales;f__Desulfovibrionaceae;g__Unclassified_Desulfovibrionaceae	0.122581	0.0627615
k__Bacteria;p__Proteobacteria;c__Deltaproteobacteria;o__Myxococcales;f__Myxococcaceae;g__Unclassified_Myxococcaceae	0.0193548	0.0167364
k__Bacteria;p__Proteobacteria;c__Deltaproteobacteria;o__Myxococcales;f__Unclassified_Myxococcales;g__Unclassified_Myxococcales	0	0.213389
k__Bacteria;p__Proteobacteria;c__Epsilonproteobacteria;o__Campylobacterales;f__Campylobacteraceae;g__Campylobacter	0	0.861925
k__Bacteria;p__Proteobacteria;c__Gammaproteobacteria;o__Aeromonadales;f__Aeromonadaceae;g__Unclassified_Aeromonadaceae	1.25806	1.5523
k__Bacteria;p__Proteobacteria;c__Gammaproteobacteria;o__Aeromonadales;f__Succinivibrionaceae;g__Succinivibrio	0	0.0083682
k__Bacteria;p__Proteobacteria;c__Gammaproteobacteria;o__Enterobacteriales;f__Enterobacteriaceae;g__Citrobacter	17.471	11.2218
k__Bacteria;p__Proteobacteria;c__Gammaproteobacteria;o__Enterobacteriales;f__Enterobacteriaceae;g__Enterobacter	8.09032	15.5105
k__Bacteria;p__Proteobacteria;c__Gammaproteobacteria;o__Enterobacteriales;f__Enterobacteriaceae;g__Erwinia	3.52903	2.5272
k__Bacteria;p__Proteobacteria;c__Gammaproteobacteria;o__Enterobacteriales;f__Enterobacteriaceae;g__Klebsiella	11.4968	27.0753
k__Bacteria;p__Proteobacteria;c__Gammaproteobacteria;o__Enterobacteriales;f__Enterobacteriaceae;g__Morganella	0.458065	6.20084
k__Bacteria;p__Proteobacteria;c__Gammaproteobacteria;o__Enterobacteriales;f__Enterobacteriaceae;g__Proteus	0.135484	2.92887
k__Bacteria;p__Proteobacteria;c__Gammaproteobacteria;o__Enterobacteriales;f__Enterobacteriaceae;g__Providencia	0.180645	0.376569
k__Bacteria;p__Proteobacteria;c__Gammaproteobacteria;o__Enterobacteriales;f__Enterobacteriaceae;g__Serratia	0.787097	6.88285
k__Bacteria;p__Proteobacteria;c__Gammaproteobacteria;o__Enterobacteriales;f__Enterobacteriaceae;g__Trabulsiella	0.541935	0.0543933
k__Bacteria;p__Proteobacteria;c__Gammaproteobacteria;o__Enterobacteriales;f__Enterobacteriaceae;g__Unclassified_Enterobacteriaceae	349.981	216.607
k__Bacteria;p__Proteobacteria;c__Gammaproteobacteria;o__Pasteurellales;f__Pasteurellaceae;g__Aggregatibacter	0.174194	0.284519
k__Bacteria;p__Proteobacteria;c__Gammaproteobacteria;o__Pasteurellales;f__Pasteurellaceae;g__Haemophilus	2.61935	4.16736
k__Bacteria;p__Proteobacteria;c__Gammaproteobacteria;o__Pasteurellales;f__Pasteurellaceae;g__Unclassified_Pasteurellaceae	0.0387097	0.0041841
k__Bacteria;p__Proteobacteria;c__Gammaproteobacteria;o__Pseudomonadales;f__Moraxellaceae;g__Acinetobacter	0.580645	1.1046
k__Bacteria;p__Proteobacteria;c__Gammaproteobacteria;o__Pseudomonadales;f__Moraxellaceae;g__Unclassified_Moraxellaceae	0.0645161	0.615063
k__Bacteria;p__Proteobacteria;c__Gammaproteobacteria;o__Pseudomonadales;f__Pseudomonadaceae;g__Pseudomonas	0.780645	0.401674
k__Bacteria;p__Proteobacteria;c__Gammaproteobacteria;o__Xanthomonadales;f__Xanthomonadaceae;g__Dokdonella	0	0.309623
k__Bacteria;p__Proteobacteria;c__Gammaproteobacteria;o__Xanthomonadales;f__Xanthomonadaceae;g__Unclassified_Xanthomonadaceae	0.0129032	0.343096
k__Bacteria;p__SR1;c__Unclassified_SR1;o__Unclassified_SR1;f__Unclassified_SR1;g__Unclassified_SR1	0	0.0878661
k__Bacteria;p__Synergistetes;c__Synergistia;o__Synergistales;f__Dethiosulfovibrionaceae;g__Pyramidobacter	0.116129	0.76569
k__Bacteria;p__Synergistetes;c__Synergistia;o__Synergistales;f__Synergistaceae;g__Cloacibacillus	0.0645161	0.41841
k__Bacteria;p__Synergistetes;c__Synergistia;o__Synergistales;f__Synergistaceae;g__Synergistes	0.225806	0.48954
k__Bacteria;p__TM7;c__TM7-3;o__CW040;f__F16;g__Unclassified_F16	0	0.142259
k__Bacteria;p__TM7;c__TM7-3;o__CW040;f__Unclassified_CW040;g__Unclassified_CW040	0.180645	0.338912
k__Bacteria;p__TM7;c__TM7-3;o__I025;f__Rs-045;g__Unclassified_Rs-045	0.122581	0.0083682
k__Bacteria;p__TM7;c__TM7-3;o__Unclassified_TM7-3;f__Unclassified_TM7-3;g__Unclassified_TM7-3	1.8129	2.00418
k__Bacteria;p__Tenericutes;c__Mollicutes;o__RF39;f__Unclassified_RF39;g__Unclassified_RF39	3.34839	8.08787
k__Bacteria;p__Tenericutes;c__RF3;o__ML615J-28;f__Unclassified_ML615J-28;g__Unclassified_ML615J-28	0	0.0753138
k__Bacteria;p__Verrucomicrobia;c__Verrucomicrobiae;o__Verrucomicrobiales;f__Verrucomicrobiaceae;g__Akkermansia	18.9935	27.1632
k__Bacteria;p__[Thermi];c__Deinococci;o__Thermales;f__Thermaceae;g__Thermus	0.174194	0.0376569
